# Supplementary material for: [Retracted] Osthole Attenuates Bleomycin‐Induced Pulmonary Fibrosis by Modulating NADPH Oxidase 4‐Derived Oxidative Stress in Mice
Source: Hindawi journal article supplement (doi:10.1155/2021/3309944), 2021-01-01
Supplement: f1 [file 3309944.f1.pdf]

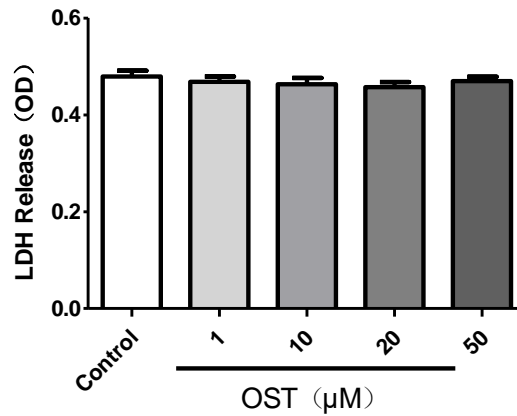

**Figure S1 Cytotoxicity of osthole to lung fibroblasts.**

MRC-5 cells were treated with OST (1-50 $\mu\text{M}$ ) for 48h, and death of MRC-5 cells was measured by LDH release assay (n=5).

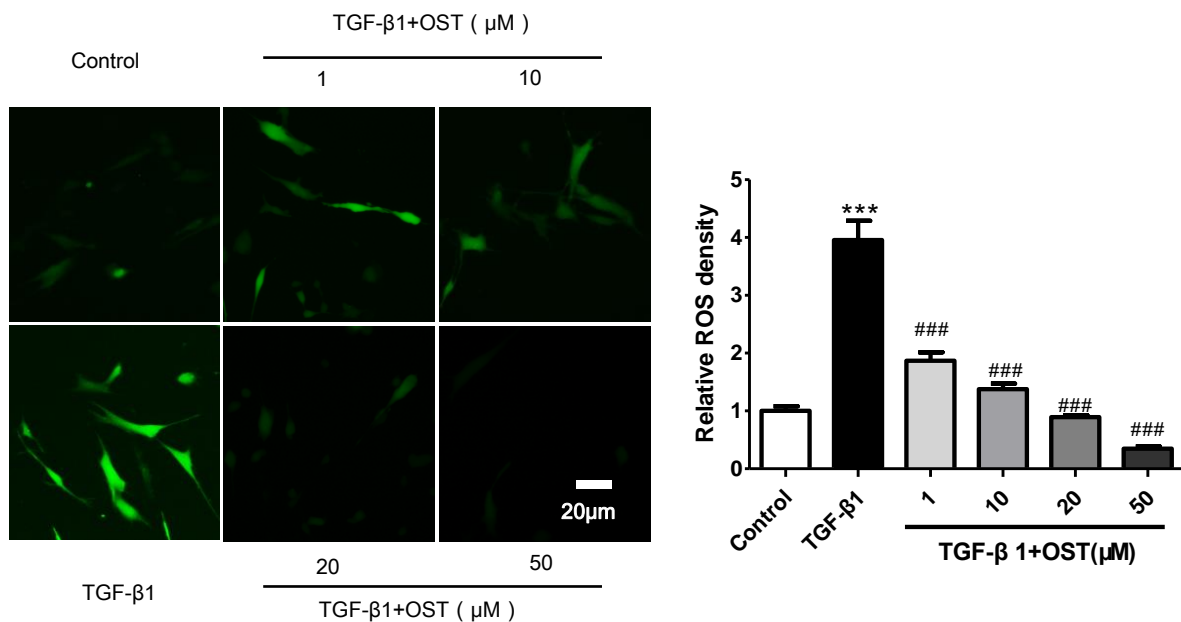

### Figure S2. Osthole inhibits TGF-β1 induced ROS

MRC-5 cells were treated with TGF-β1 (10ng/ml) and OST (1-50μM ) for 24h, then level of ROS was tested(n=5, scale bar= 20μm).

\*\*\*P<0.001 vs control group; ###P<0.001 vs TGF-β1 group

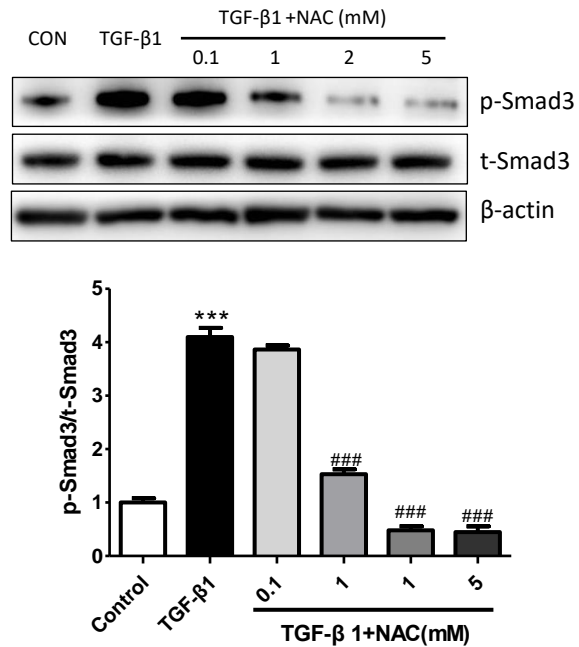

### Figure S3. ROS participate in

MRC-5 cells were treated with TGF-β1 (10ng/ml) and NAC (0.1-2M ) for 24h, then expression of p-Smad3 and t-Smad3 was evaluated by western blot(n=3). \*\*\*P<0.001 vs control group; ###P<0.001 vs TGF-β1 group
